# Supplementary material for: Transfer Learning in Trajectory Decoding: Sensor or Source Space?
Source: MDPI journal article supplement (doi:10.3390/s23073593), 2023-03-30
Supplement: s1 [file s1]

# Transfer learning in trajectory decoding: Sensor or source space?

## Authors

Nitikorn Srisrisawang<sup>1</sup> and Gernot R. Müller-Putz<sup>1,2,\*</sup>

<sup>1</sup> Institute of Neural Engineering, Graz University of Technology, Stremayrgasse 16/IV, 8010 Graz, Austria

<sup>2</sup> BioTechMed Graz, Austria

\* Corresponding author. Institute of Neural Engineering, Graz University of Technology, Graz, Styria, Austria. E-mail address: gernot.mueller@tugraz.at (G.R. Müller-Putz)

**Keywords:** electroencephalography, brain-computer interface, source localization, trajectory decoding, partial least squares regression, unscented Kalman filter, transfer learning

## Supplementary materials

Table S1: The median correlations corresponding to Figure 3. The value in parentheses indicates the standard deviation.

| Session | %EEG | Gen            |                | GenC           |                | Ind            |                | IndC           |                |
|---------|------|----------------|----------------|----------------|----------------|----------------|----------------|----------------|----------------|
|         |      | Se             | SS             | Se             | SS             | Se             | SS             | Se             | SS             |
| 1       | 0%   | 0.04<br>(0.03) | 0.02<br>(0.02) | 0.04<br>(0.03) | 0.02<br>(0.02) | 0.04<br>(0.03) | 0.02<br>(0.02) | 0.04<br>(0.03) | 0.02<br>(0.02) |
|         | 50%  | 0.05<br>(0.06) | 0.05<br>(0.05) | 0.08<br>(0.05) | 0.08<br>(0.04) | 0.18<br>(0.08) | 0.17<br>(0.08) | 0.18<br>(0.08) | 0.17<br>(0.08) |
|         | 100% | 0.05<br>(0.04) | 0.04<br>(0.04) | 0.07<br>(0.06) | 0.07<br>(0.06) | 0.10<br>(0.07) | 0.09<br>(0.07) | 0.10<br>(0.07) | 0.09<br>(0.07) |
| 2       | 0%   | 0.07<br>(0.04) | 0.05<br>(0.04) | 0.08<br>(0.04) | 0.07<br>(0.03) | 0.09<br>(0.04) | 0.06<br>(0.05) | 0.09<br>(0.04) | 0.06<br>(0.05) |
|         | 50%  | 0.09<br>(0.06) | 0.06<br>(0.04) | 0.11<br>(0.08) | 0.14<br>(0.08) | 0.19<br>(0.10) | 0.18<br>(0.09) | 0.16<br>(0.08) | 0.17<br>(0.08) |
|         | 100% | 0.06<br>(0.04) | 0.05<br>(0.06) | 0.09<br>(0.06) | 0.09<br>(0.07) | 0.15<br>(0.09) | 0.15<br>(0.09) | 0.14<br>(0.08) | 0.15<br>(0.07) |
| 3       | 0%   | 0.06<br>(0.05) | 0.06<br>(0.04) | 0.08<br>(0.05) | 0.08<br>(0.04) | 0.10<br>(0.06) | 0.10<br>(0.05) | 0.12<br>(0.06) | 0.10<br>(0.05) |
|         | 50%  | 0.03<br>(0.05) | 0.05<br>(0.04) | 0.07<br>(0.05) | 0.10<br>(0.05) | 0.15<br>(0.06) | 0.13<br>(0.05) | 0.13<br>(0.05) | 0.14<br>(0.04) |
|         | 100% | 0.06<br>(0.03) | 0.04<br>(0.02) | 0.10<br>(0.04) | 0.08<br>(0.05) | 0.11<br>(0.05) | 0.11<br>(0.05) | 0.12<br>(0.06) | 0.12<br>(0.05) |

Table S2: The median SNRs corresponding to Figure 4. The value in parentheses indicates the standard deviation.

| Session | %EEG | Gen             |                 | GenC            |                 | Ind             |                 | IndC            |                 |
|---------|------|-----------------|-----------------|-----------------|-----------------|-----------------|-----------------|-----------------|-----------------|
|         |      | Se              | SS              | Se              | SS              | Se              | SS              | Se              | SS              |
| 1       | 0%   | -4.97<br>(1.35) | -5.45<br>(1.97) | -4.97<br>(1.35) | -5.45<br>(1.97) | -4.97<br>(1.35) | -5.45<br>(1.97) | -4.97<br>(1.35) | -5.45<br>(1.97) |
|         | 50%  | -5.71<br>(1.48) | -5.85<br>(2.00) | -5.85<br>(1.58) | -5.70<br>(1.71) | -2.95<br>(1.05) | -3.11<br>(1.11) | -2.95<br>(1.05) | -3.11<br>(1.11) |
|         | 100% | -5.30<br>(1.27) | -5.35<br>(1.31) | -5.43<br>(1.37) | -5.32<br>(1.45) | -3.52<br>(1.05) | -3.53<br>(1.01) | -3.52<br>(1.05) | -3.53<br>(1.01) |
| 2       | 0%   | -5.33<br>(1.15) | -4.92<br>(1.01) | -5.32<br>(1.09) | -4.89<br>(0.95) | -3.57<br>(0.89) | -4.11<br>(1.71) | -3.57<br>(0.89) | -4.11<br>(1.71) |
|         | 50%  | -5.32<br>(1.56) | -5.25<br>(1.33) | -5.64<br>(1.64) | -5.34<br>(1.35) | -2.87<br>(0.49) | -3.10<br>(0.54) | -3.24<br>(0.40) | -3.36<br>(0.38) |
|         | 100% | -5.43<br>(1.40) | -5.38<br>(1.41) | -5.74<br>(1.20) | -5.54<br>(1.38) | -2.88<br>(0.76) | -3.01<br>(0.69) | -3.28<br>(0.50) | -3.28<br>(0.58) |
| 3       | 0%   | -4.69<br>(1.74) | -4.79<br>(1.77) | -4.57<br>(1.43) | -4.77<br>(1.51) | -3.32<br>(1.16) | -3.05<br>(0.94) | -3.15<br>(0.89) | -3.33<br>(0.72) |
|         | 50%  | -4.87<br>(1.45) | -5.03<br>(1.58) | -4.76<br>(1.13) | -4.80<br>(1.10) | -2.96<br>(0.86) | -3.21<br>(0.88) | -3.12<br>(0.58) | -3.15<br>(0.39) |
|         | 100% | -4.96<br>(1.44) | -5.29<br>(1.53) | -4.72<br>(0.91) | -5.13<br>(1.15) | -3.05<br>(0.72) | -3.07<br>(0.67) | -3.20<br>(0.30) | -3.08<br>(0.26) |

Table S3: P-values obtained from pairwise two-tailed Wilcoxon signed-rank tests for the **correlations in position**. The color indicates the significant level: Green (<0.05), Blue (<0.01), and Purple (<0.001). P-values are adjusted to control the false discovery rate (FDR).

|         |         |         |          |         |         |         |        |         |
|---------|---------|---------|----------|---------|---------|---------|--------|---------|
| Se-Gen  |         |         |          |         |         |         |        |         |
| Se-GenC | 5.2e-09 |         |          |         |         |         |        |         |
| Se-Ind  | 5.8e-13 | 9.7e-10 |          |         |         |         |        |         |
| Se-IndC | 2e-12   | 1.3e-08 | 0.0445   |         |         |         |        |         |
| SS-Gen  | 0.1196  | 3.2e-07 | 2.8e-14  | 1.9e-13 |         |         |        |         |
| SS-GenC | 1.3e-04 | 0.5972  | 2.55e-09 | 3.9e-07 | 1.4e-08 |         |        |         |
| SS-Ind  | 9.3e-10 | 2.1e-06 | 0.0035   | 0.5198  | 3.4e-11 | 2.8e-06 |        |         |
| SS-IndC | 4.7e-10 | 3.9e-07 | 0.0074   | 0.5350  | 3.8e-12 | 2.2e-06 | 0.8263 |         |
|         | Se-Gen  | Se-GenC | Se-Ind   | Se-IndC | SS-Gen  | SS-GenC | SS-Ind | SS-IndC |

Table S4: P-values obtained from pairwise two-tailed Wilcoxon signed-rank tests for the **correlations in velocity**. The color indicates the significant level: Green (<0.05), Blue (<0.01), and Purple (<0.001). P-values are adjusted to control the false discovery rate (FDR).

|         |         |         |         |         |         |         |        |         |
|---------|---------|---------|---------|---------|---------|---------|--------|---------|
| Se-Gen  |         |         |         |         |         |         |        |         |
| Se-GenC | 2.6e-10 |         |         |         |         |         |        |         |
| Se-Ind  | 5.9e-13 | 2.9e-09 |         |         |         |         |        |         |
| Se-IndC | 1.1e-12 | 3.3e-08 | 0.0643  |         |         |         |        |         |
| SS-Gen  | 0.0427  | 1e-08   | 2.8e-14 | 4.5e-14 |         |         |        |         |
| SS-GenC | 3.4e-04 | 0.8527  | 3.2e-09 | 3e-07   | 6e-09   |         |        |         |
| SS-Ind  | 2.5e-09 | 7.3e-06 | 0.0013  | 0.3404  | 1.8e-11 | 2.8e-06 |        |         |
| SS-IndC | 4e-10   | 2.1e-06 | 0.0038  | 0.4652  | 2.2e-12 | 3e-06   | 0.8081 |         |
| y/x     | Se-Gen  | Se-GenC | Se-Ind  | Se-IndC | SS-Gen  | SS-GenC | SS-Ind | SS-IndC |

Table S5: P-values obtained from pairwise two-tailed Wilcoxon signed-rank tests for the **correlations in non-linear kinematics**. The color indicates the significant level: Green (<0.05), Blue (<0.01), and Purple (<0.001). P-values are adjusted to control the false discovery rate (FDR).

|         |         |         |        |         |         |         |        |         |
|---------|---------|---------|--------|---------|---------|---------|--------|---------|
| Se-Gen  |         |         |        |         |         |         |        |         |
| Se-GenC | 1.2e-06 |         |        |         |         |         |        |         |
| Se-Ind  | 1.8e-05 | 0.1396  |        |         |         |         |        |         |
| Se-IndC | 5.2e-08 | 9.2e-04 | 0.0156 |         |         |         |        |         |
| SS-Gen  | 0.6665  | 6.5e-04 | 8e-06  | 9.9e-09 |         |         |        |         |
| SS-GenC | 0.0060  | 0.0882  | 0.0076 | 8.6e-06 | 0.0081  |         |        |         |
| SS-Ind  | 7.6e-05 | 0.1342  | 0.9419 | 0.06    | 5.6e-06 | 0.0074  |        |         |
| SS-IndC | 1.5e-05 | 0.0445  | 0.7764 | 0.0277  | 1e-06   | 3.7e-04 | 0.5424 |         |
| y/x     | Se-Gen  | Se-GenC | Se-Ind | Se-IndC | SS-Gen  | SS-GenC | SS-Ind | SS-IndC |

Table S6: P-values obtained from pairwise two-tailed Wilcoxon signed-rank tests for the **SNRs in position**. The color indicates the significant level: Green (<0.05), Blue (<0.01), and Purple (<0.001). P-values are adjusted to control the false discovery rate (FDR).

|         |         |         |         |         |         |         |        |         |
|---------|---------|---------|---------|---------|---------|---------|--------|---------|
| Se-Gen  |         |         |         |         |         |         |        |         |
| Se-GenC | 0.9114  |         |         |         |         |         |        |         |
| Se-Ind  | 1e-23   | 4.3e-24 |         |         |         |         |        |         |
| Se-IndC | 3.3e-24 | 2.3e-24 | 0.0353  |         |         |         |        |         |
| SS-Gen  | 0.1180  | 0.1463  | 3.6e-24 | 3.7e-25 |         |         |        |         |
| SS-GenC | 0.7251  | 0.7658  | 2.9e-24 | 3.7e-25 | 0.0412  |         |        |         |
| SS-Ind  | 5.2e-21 | 1.4e-21 | 9.5e-05 | 0.3710  | 7.4e-22 | 3.9e-22 |        |         |
| SS-IndC | 3.2e-21 | 1.1e-21 | 2.2e-04 | 0.0108  | 1.6e-22 | 6.1e-23 | 0.1823 |         |
| y/x     | Se-Gen  | Se-GenC | Se-Ind  | Se-IndC | SS-Gen  | SS-GenC | SS-Ind | SS-IndC |

Table S7: P-values obtained from pairwise two-tailed Wilcoxon signed-rank tests for the **SNRs in velocity**. The color indicates the significant level: Green (<0.05), Blue (<0.01), and Purple (<0.001). P-values are adjusted to control the false discovery rate (FDR).

|         |         |         |         |         |         |         |        |         |
|---------|---------|---------|---------|---------|---------|---------|--------|---------|
| Se-Gen  |         |         |         |         |         |         |        |         |
| Se-GenC | 0.8693  |         |         |         |         |         |        |         |
| Se-Ind  | 6.1e-23 | 1.4e-23 |         |         |         |         |        |         |
| Se-IndC | 1.3e-23 | 3.3e-24 | 0.0123  |         |         |         |        |         |
| SS-Gen  | 0.1196  | 0.1405  | 1.3e-23 | 1.2e-24 |         |         |        |         |
| SS-GenC | 0.8081  | 0.7917  | 6.2e-24 | 7.6e-25 | 0.0707  |         |        |         |
| SS-Ind  | 7.5e-20 | 1e-20   | 2.6e-04 | 0.7764  | 2.4e-21 | 8.3e-22 |        |         |
| SS-IndC | 3.5e-20 | 7.9e-21 | 2.7e-04 | 0.0659  | 4.5e-22 | 1.1e-22 | 0.0989 |         |
| y/x     | Se-Gen  | Se-GenC | Se-Ind  | Se-IndC | SS-Gen  | SS-GenC | SS-Ind | SS-IndC |

Table S8: P-values obtained from pairwise two-tailed Wilcoxon signed-rank tests for the **SNRs in non-linear kinematics**. The color indicates the significant level: Green (<0.05), Blue (<0.01), and Purple (<0.001). P-values are adjusted to control the false discovery rate (FDR).

|         |         |         |          |         |         |         |        |         |
|---------|---------|---------|----------|---------|---------|---------|--------|---------|
| Se-Gen  |         |         |          |         |         |         |        |         |
| Se-GenC | 0.0137  |         |          |         |         |         |        |         |
| Se-Ind  | 1.4e-23 | 4.8e-24 |          |         |         |         |        |         |
| Se-IndC | 3.3e-24 | 3.7e-25 | 0.0343   |         |         |         |        |         |
| SS-Gen  | 0.4652  | 0.6456  | 3.4e-23  | 7.6e-24 |         |         |        |         |
| SS-GenC | 0.4130  | 0.7859  | 3.33e-24 | 3.7e-25 | 0.1228  |         |        |         |
| SS-Ind  | 1.3e-19 | 2.4e-21 | 0.0230   | 0.8246  | 5.8e-21 | 6.6e-22 |        |         |
| SS-IndC | 1e-19   | 1.3e-21 | 0.0012   | 0.0213  | 1.7e-21 | 3.1e-23 | 0.0165 |         |
| y/x     | Se-Gen  | Se-GenC | Se-Ind   | Se-IndC | SS-Gen  | SS-GenC | SS-Ind | SS-IndC |

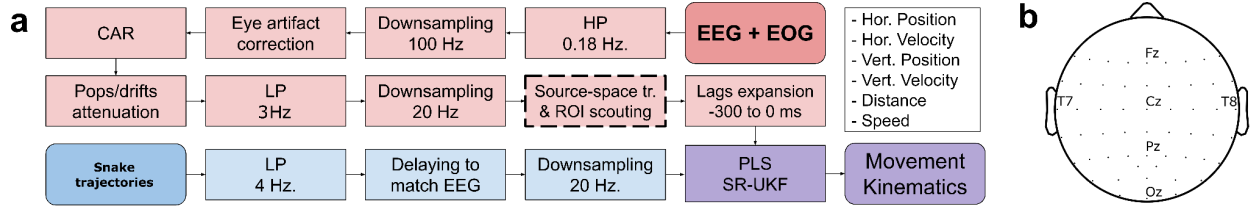

Figure S1: a) Signal processing pipeline of the EEG, EOG signals and the corresponding snake trajectories. b) Electrodes layout for the EEG signals

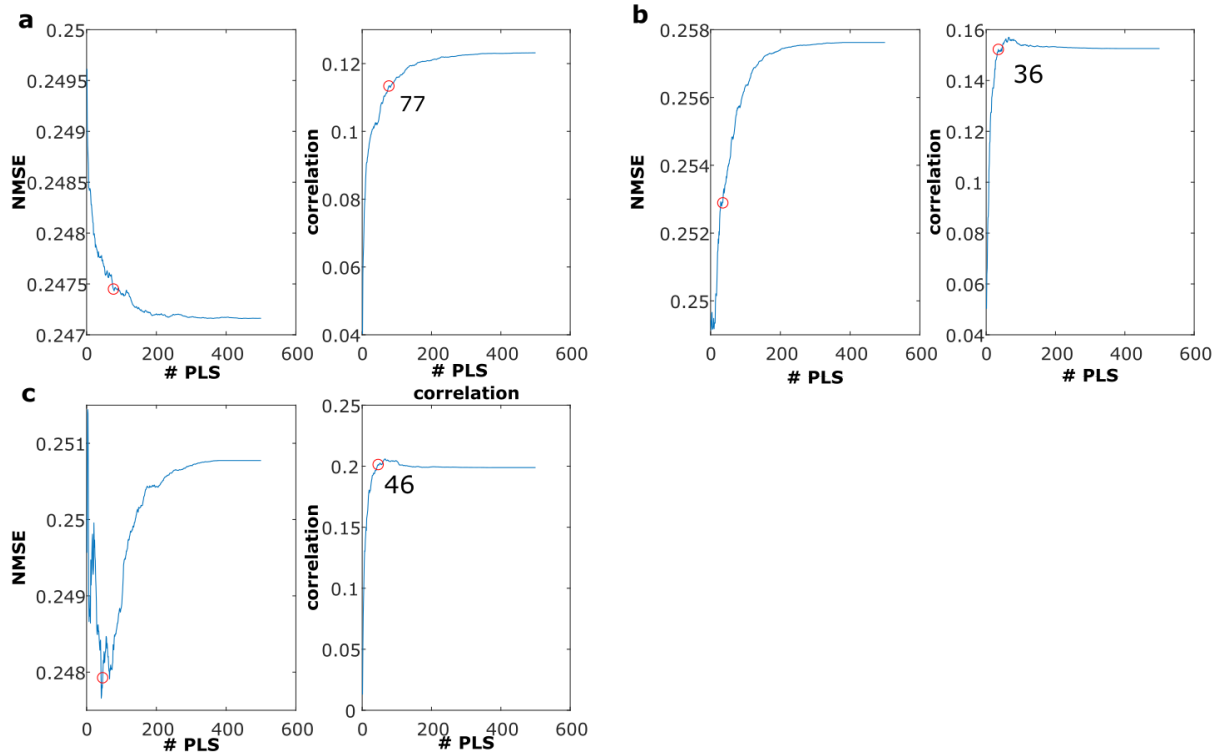

Figure S2: Exemplary of plots between normalized mean squares error (NMSE) and correlation between PLS predicted kinematics (only position and velocity) and the ground truth kinematics with a different number of PLS latent components. The NMSE and correlation shown are the average value across 4 kinematics and 10-fold cross-validation. The red circle represents the “knee” point chosen as the optimum point, and the number represents the optimum number of PLS latent components. a) the case where correlation increases while NMSE decreases, b) the case where NMSE and correlation both increase, and c) the mixed case where NMSE initially decreases but then increases again.

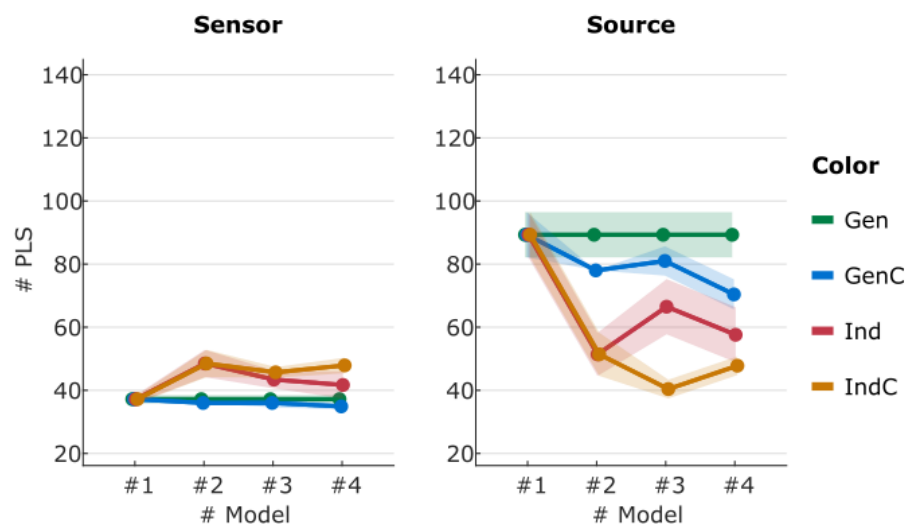

Figure S3: Average number of optimum PLS latent components of each adaptation strategy, represented by color, at each adaptation stage (see Figure 1). The shaded area represents the standard error.

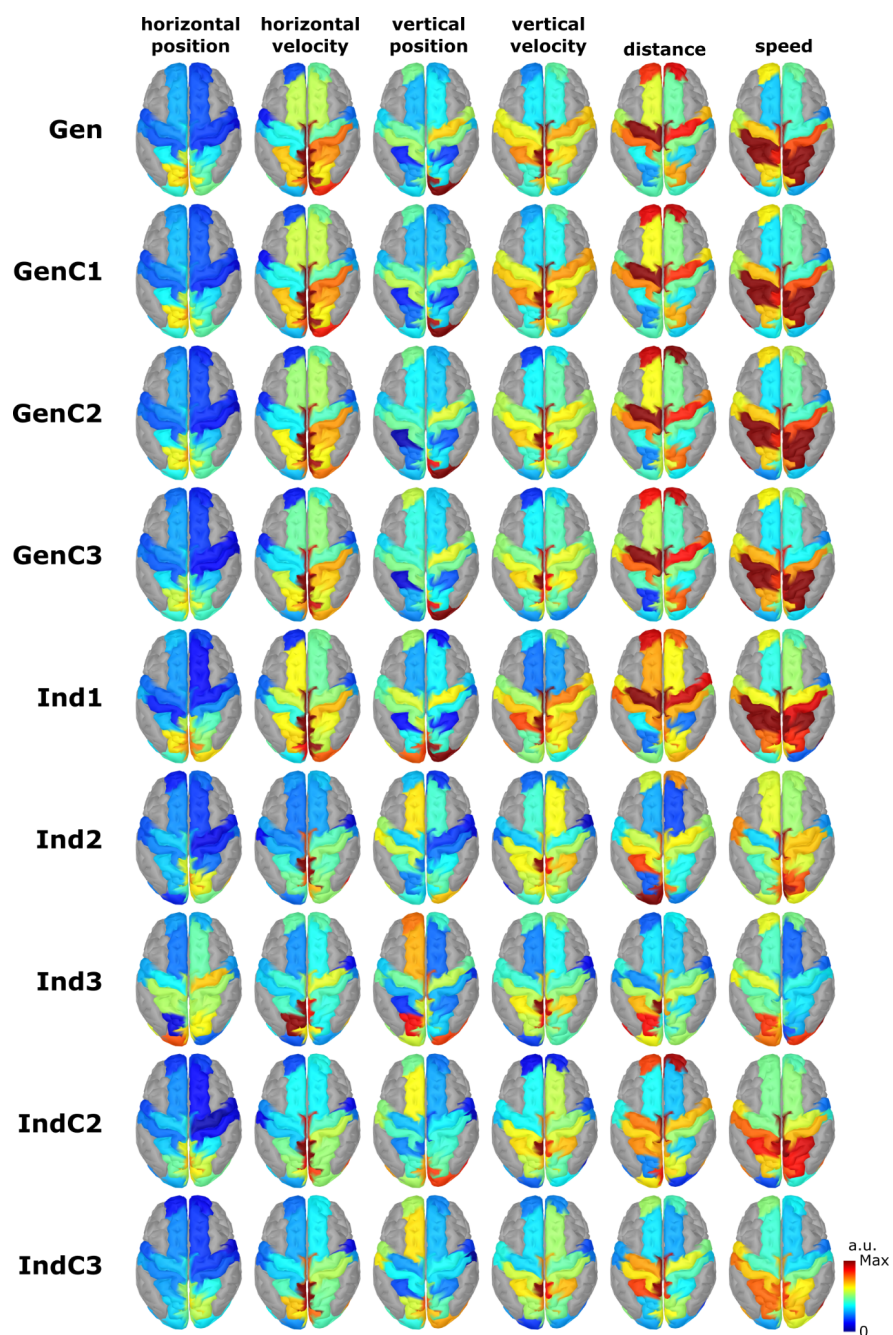

Figure S4: The group-level decoding pattern at lag 0 of all models (The naming was according to Figure 1). Blue and red indicate the value at 0 and maximum
